# Supplementary material
Source: PubMed Central journal article supplement (PMC7263374)
Supplement: NIHMS1005462-supplement-sup.pdf [file NIHMS1005462-supplement-sup.pdf]

Appendix Table A1. Pearson correlation coefficients among the biomarkers. Box-Cox transformed data were used.

|               | IL-1ra | IL-1a | IFN- $\gamma$ | IL-10 | IL-6  | IL-8  | TNF- $\alpha$ | NTX  | CTXII | COMP | sGAG  | MMP-1 | MMP-3 | MMP-9 | CPII |
|---------------|--------|-------|---------------|-------|-------|-------|---------------|------|-------|------|-------|-------|-------|-------|------|
| IL-1a         | .29    |       |               |       |       |       |               |      |       |      |       |       |       |       |      |
| IFN- $\gamma$ | .13    | .20   |               |       |       |       |               |      |       |      |       |       |       |       |      |
| IL-10         | .01    | .14   | .42*          |       |       |       |               |      |       |      |       |       |       |       |      |
| IL-6          | .22    | .06   | .33           | .46*  |       |       |               |      |       |      |       |       |       |       |      |
| IL-8          | .18    | .03   | .15           | .48*  | .53** |       |               |      |       |      |       |       |       |       |      |
| TNF- $\alpha$ | .17    | .03   | .43*          | .76** | .61** | .71** |               |      |       |      |       |       |       |       |      |
| NTX           | .04    | .13   | .19           | -.19  | -.22  | .07   | -.16          |      |       |      |       |       |       |       |      |
| CTXII         | .14    | .05   | -.22          | -.06  | -.20  | -.04  | -.03          | .17  |       |      |       |       |       |       |      |
| COMP          | .05    | .21   | -.25          | -.12  | -.29  | .18   | -.03          | .44* | .54** |      |       |       |       |       |      |
| sGAG          | .28    | -.10  | -.35          | -.31  | -.27  | -.18  | -.32          | .15  | .44*  | .36  |       |       |       |       |      |
| MMP-1         | -.23   | .07   | .01           | .45*  | .50** | .58** | .43*          | -.13 | 0.0   | .07  | -.32  |       |       |       |      |
| MMP-3         | -.12   | .07   | .19           | .54** | .49*  | .68** | .56**         | .06  | .12   | .22  | -.41* | .87** |       |       |      |
| MMP-9         | -.11   | .16   | .11           | .01   | .06   | .01   | -.08          | .12  | -.22  | .07  | -.19  | .20   | .25   |       |      |
| CPII          | -.24   | -.16  | -.15          | -.20  | -.02  | .05   | -.01          | -.20 | .15   | .03  | .07   | .30   | .04   | -.34  |      |
| B + B         | -.20   | .25   | .28           | .28   | -.12  | .14   | .28           | -.04 | -.10  | -.03 | 0.0   | .03   | .04   | .26   | .02  |

\* p < 0.05; \*\* p < 0.01. B+B = bilirubin + biliverdin. Light yellow=weak correlation (R  $\leq$  0.5); orange=moderate correlation (0.5 < R  $\leq$  0.8); red=strong correlation (R > 0.8).

Appendix Table A2. Mean and standard deviation of T1 $\rho$  and T2 relaxation times at each time point. All units are measured in milliseconds.

| A. T1 $\rho$ | MF             | LF             | MT             | LT             | P              | TrF            |
|--------------|----------------|----------------|----------------|----------------|----------------|----------------|
| BL (n=26)    | 39.0 $\pm$ 2.9 | 39.2 $\pm$ 2.8 | 35.7 $\pm$ 3.0 | 34.6 $\pm$ 3.0 | 39.0 $\pm$ 3.7 | 40.4 $\pm$ 2.9 |
| 6M (n=23)    | 42.0 $\pm$ 2.7 | 40.7 $\pm$ 2.9 | 36.3 $\pm$ 3.2 | 34.5 $\pm$ 3.6 | 39.0 $\pm$ 3.2 | 41.6 $\pm$ 2.8 |
| 1Y (n=21)    | 41.8 $\pm$ 2.5 | 40.8 $\pm$ 3.2 | 36.7 $\pm$ 4.1 | 34.5 $\pm$ 2.6 | 38.9 $\pm$ 3.7 | 42.0 $\pm$ 3.3 |
| 2Y (n=19)    | 41.8 $\pm$ 1.9 | 40.4 $\pm$ 2.4 | 36.9 $\pm$ 3.2 | 34.7 $\pm$ 3.5 | 39.4 $\pm$ 2.6 | 42.4 $\pm$ 3.4 |
| 3Y (n=18)    | 42.2 $\pm$ 2.5 | 40.9 $\pm$ 3.0 | 36.5 $\pm$ 2.8 | 34.8 $\pm$ 4.1 | 40.0 $\pm$ 3.8 | 43.1 $\pm$ 4.2 |

| B. T2     | MF             | LF             | MT             | LT             | P              | TrF            |
|-----------|----------------|----------------|----------------|----------------|----------------|----------------|
| BL (n=26) | 30.3 $\pm$ 2.4 | 30.0 $\pm$ 2.8 | 27.1 $\pm$ 2.7 | 25.5 $\pm$ 2.6 | 28.6 $\pm$ 3.1 | 31.4 $\pm$ 2.7 |
| 6M (n=23) | 30.8 $\pm$ 2.5 | 30.8 $\pm$ 2.5 | 28.0 $\pm$ 2.5 | 25.1 $\pm$ 1.8 | 28.5 $\pm$ 2.2 | 32.3 $\pm$ 2.8 |
| 1Y (n=21) | 32.5 $\pm$ 3.1 | 31.1 $\pm$ 3.0 | 28.1 $\pm$ 2.9 | 25.0 $\pm$ 2.7 | 28.3 $\pm$ 3.3 | 32.9 $\pm$ 3.2 |
| 2Y (n=19) | 33.2 $\pm$ 2.1 | 31.3 $\pm$ 2.7 | 27.9 $\pm$ 2.6 | 26.1 $\pm$ 2.7 | 29.4 $\pm$ 3.9 | 34.0 $\pm$ 3.6 |
| 3Y (n=18) | 33.0 $\pm$ 2.1 | 31.1 $\pm$ 2.2 | 27.9 $\pm$ 3.0 | 25.8 $\pm$ 2.4 | 28.7 $\pm$ 2.9 | 34.2 $\pm$ 2.8 |

MF=medial femur, LF=lateral femur, MT=medial tibia, LT=lateral tibia, P=patella, TrF=trochlea
